1 Impact of neurite alignment on organelle motion

2 Maria Mytiliniou<sup>1</sup>, Joeri A. J. Wondergem<sup>1</sup>, Thomas Schmidt<sup>1</sup>, and Doris

3 Heinrich<sup>1,2,3,4,\*</sup>

4 <sup>1</sup>Leiden Institute of Physics, Huygens-Kamerlingh Onnes Laboratory, Leiden

5 University, Leiden, the Netherlands

6 <sup>2</sup>Institute for Bioprocessing and Analytical Measurement Techniques,

7 Rosenhof, 37308 Heilbad Heiligenstadt, Germany

8 <sup>3</sup>Faculty for Mathematics and Natural Sciences, Technische Universität

9 Ilmenau, Ilmenau, Germany

10 <sup>4</sup>Fraunhofer Institute for Silicate Research ISC, Würzburg, Germany

11 \*Corresponding Author: [heinrich@physics.leidenuniv.nl](mailto:heinrich@physics.leidenuniv.nl)

12 July 26, 2021

## 13 Abstract

14 Intracellular transport is pivotal for cell growth and survival. Malfunctions in this process  
15 have been associated with devastating neurodegenerative diseases, posing a need for deeper  
16 understanding of the involved mechanisms. Here, we used an experimental methodology that  
17 lead neurites of differentiated PC12 cells in either of two configurations: an one-dimensional,  
18 where the neurites align along lines, or a two-dimensional configuration, where the neurites  
19 adopt a random orientation and shape on a flat substrate. We subsequently monitored  
20 the motion of functional organelles, the lysosomes, inside the neurites. Implementing a  
21 time-resolved analysis of the mean-squared displacement, we quantitatively characterized  
22 distinct motion modes of the lysosomes. Our results indicate that neurite alignment gives  
23 rise to faster diffusive and super-diffusive lysosomal motion in comparison to the situation  
24 where the neurites are randomly oriented. After inducing lysosome swelling through an  
25 osmotic challenge by sucrose, we confirmed the predicted slowdown in diffusive mobility.  
26 Surprisingly we found that the swelling-induced mobility change affected each of the (sub-  
27 /super-) diffusive motion modes differently and depended on the alignment configuration  
28 of the neurites. Our findings imply that intracellular transport is significantly and robustly  
29 dependent on cell morphology, which might be in part controlled by the extracellular matrix.

## 30 Introduction

31 One critical function not only for the growth and maintenance of homeostasis, but also  
32 for the survival of a cell, is the transport of proteins, molecules, organelles and debris to  
33 specific locations within the cell. This allocation is of tremendous significance, especially for  
34 neuronal cells due to the extreme size of their axons; for instance, axons of human motor  
35 neurons can reach the length of one meter, starting from the brain and extending till the end  
36 of the spine. Defects in the process of intracellular transport have long been associated with  
37 human diseases (Aridor and Lisa A. Hannan 2000; Aridor and Lisa A Hannan 2002; Sleight  
38 et al. 2019; Appert-Rolland, Ebbinghaus, and Santen 2015; De Vos and Hafezparast 2017),  
39 but whether such defects are the cause or the consequence of pathological phenotypes, is still  
40 under debate in several cases (Moloney, Winter, and Verhaagen 2014; Prior et al. 2017).

41 Intracellular distribution of molecules and organelles is achieved mainly via two mech-  
42 anisms: passive diffusion and active, motor-driven, transport along microtubules and actin  
43 filaments (Vale 2003). Cytoskeletal components, organelles and molecules crowd the cyto-  
44 plasm, thereby hindering or enhancing passive diffusion, thus leading to sub-diffusive and  
45 super-diffusive intracellular motion (Götz et al. 2015; Otten et al. 2012; Witzel et al. 2019;  
46 S Mogre, Brown, and Koslover 2020). In order to characterize intracellular dynamics and  
47 extract values such as the velocity of the motor-mediated transport or the diffusion coeffi-  
48 cient of passive motion, several models have been implemented (Bressloff and Newby 2013;  
49 Briane, Kervrann, and Vimond 2018; Norregaard et al. 2017).

50 A frequently used approach exploits the Mean Squared Displacement (MSD) plotted as  
51 a function of lag time and subsequently fitted with a power law in the form of  $\sim 2dD\tau^\alpha$ ,  
52 where  $d$  is the dimensionality,  $D$  the diffusion coefficient and  $\tau$  the lag time (Gal, Lechtman-  
53 Goldstein, and Weihs 2013; Grady et al. 2017). The characteristic exponent ( $\alpha$ ) value reveals  
54 the type of motion, differentiating among Brownian diffusion ( $\alpha = 1$ ), from now on referred

55 to as diffusion, super-diffusion ( $\alpha > 1$ ) and sub-diffusion ( $\alpha < 1$ ). In the case of complex  
56 motion, such as intracellular transport, comprising a combination of alternating phases of  
57 sub-diffusion, free diffusion and motor-driven active transport, motion discriminating algo-  
58 rithms are essential to avoid averaging out dynamic information. Thus, local-MSD (lMSD)  
59 analysis can be performed instead of fitting the entire MSD curve, providing time-resolved  
60 information of the motion states within a trajectory. This analysis implements a rolling win-  
61 dow over the entire trajectory, thereby characterizing each data point with the  $\alpha$  exponent  
62 value (Arcizet et al. 2008; Mahowald, Arcizet, and Heinrich 2009; Otten et al. 2012; Dupont  
63 et al. 2013; Götz et al. 2015).

64 Although the MSD analysis is a well-established tool, a reliable and less noisy MSD curve  
65 requires many data points and long trajectories which, in the case of biological data, can  
66 be challenging to acquire (Michalet 2010). Additionally, selection of the model to fit is not  
67 always straightforward, especially in the instance of complex data with multiple underlying  
68 processes (Türkcan and Masson 2013). Furthermore, the MSD curve is sensitive to exper-  
69 imental parameters such as the acquisition frame rate and the size of the imaged particle  
70 (Gal, Lechtman-Goldstein, and Weihs 2013).

71 Hence, the use of an additional method, the van Hove distribution (Van Hove 1954), for  
72 the analysis of intracellular data can counterweight the drawbacks described above and pro-  
73 vide a more in-depth view of intracellular transport than that gained from the MSD analysis  
74 alone. The van Hove distribution, alternatively called Jump Distance Distribution (JDD)  
75 was initially used for particle scattering experiments (De Bar 1963; Dahlborg, Gudowski,  
76 and Davidovic 1989). The JDD is plotted for a specific lag time and depicts the Euclidian  
77 displacement distribution of the observed particles within the given time lag, in the form of  
78 a Probability Distribution Function (PDF). Thus, this distribution reveals the displacement-  
79 dependent structure which is, otherwise, "hidden" in a single, averaged data point, for the  
80 respective lag time, of the MSD curve.

81 Already in 1997, Schütz et al. showed that by fitting the probability distribution of the  
82 squared displacements of single-molecules moving on membranes, one can extract individual  
83 diffusion constants and fractions of multiple-component samples (Schütz, Schindler, and  
84 Schmidt 1997). Along the same lines, Kues et al. analyzed single-molecule motion inside  
85 cell nuclei, distinguishing among three mobility states (Kues, Peters, and Kubitscheck 2001).  
86 Over time, application of this analysis for Brownian motion in fluids (Hopkins et al. 2010)  
87 and in - actual or simulated - biological systems increased (Ghosh et al. 2016; Menssen and  
88 Mani 2019; Grady et al. 2017; Bhowmik, Tah, and Karmakar 2018; Witzel et al. 2019),  
89 establishing it as a powerful tool for characterization of complex biological trajectories.

90 Here, we set out to characterize trajectories of lysosomes inside neurites of differentiated  
91 PC12 cells (Lloyd A Greene and Tischler 1976; Lloyd A Greene 1978; Lloyd A. Greene et al.  
92 1987), commonly used as neuronal model (Wang et al. 2015; Christen et al. 2017; Pelzl et al.  
93 2009). Neurites are the precursors of dendrites and axons in immature neurons (Letierrier,  
94 Dubey, and Roy 2017) hence, motion analysis within neurites can provide significant insight  
95 into axonal transport. Lysosomes are organelles that play a vital role in the autophagy  
96 pathway of cells and exhibit both diffusive motion and active transport via dynein and  
97 kinesin motor proteins along microtubules. Not only the autophagy pathway in general  
98 (Nixon 2013; Menzies, Fleming, and Rubinsztein 2015; Ramesh and Pandey 2017), but also  
99 the motion of lysosomes specifically appear to be implicated with neurodegenerative diseases  
100 and cancer (Lawrence and Zoncu 2019; Amick and Ferguson 2017; Burk and Pasterkamp  
101 2019; Oyarzún et al. 2019).

102 We show that neurite alignment, achieved via chemical surface patterning, results in  
103 faster diffusive and super-diffusive lysosomal motion in comparison to the case where the  
104 neurites adopt a random orientation. Moreover, we introduce a perturbation in the cellular  
105 environment via incubation with sucrose and confirm experimentally that the sucrose induces  
106 lysosomal enlargement, which leads to a proportionate decrease in the diffusion coefficient.

107 Implementing LMSD analysis, we identify and extract the trajectory parts that belong into  
108 each of three classes of motion, namely sub-diffusive, diffusive and super-diffusive. By collec-  
109 tively analyzing the data points of the respective class, we gain quantitative insights for each  
110 motion mode. Our findings indicate that the incubation with sucrose results in a different  
111 effect on each motion mode of the organelles, and this also depends on the configuration of  
112 the neurites within which the motion occurs.

## 113 Results

114 We set out to characterize intracellular organelle transport and to compare motion features  
115 under two distinct neurite configurations. We investigated the motion of lysosomes inside  
116 neurites of differentiated PC12 cells, when those adopt a random orientation on the two-  
117 dimensional culture surface, versus when they are prompted to adhere to an one-dimensional  
118 configuration by means of chemical surface patterning.

### 119 **microscale Plasma - Initiated Patterning ( $\mu$ PIP) of Laminin guides** 120 **the neurites of differentiated PC12 cells along 2 $\mu$ m-wide lines.**

121 We achieved one-dimensional neurite alignment by selective protein deposition on the cell  
122 substrate. The steps followed during the  $\mu$ PIP are schematically shown in Fig. 1.C-F. A  
123 polydimethylsiloxane (PDMS) mask bearing a ladder-shape pattern was used. Scanning-  
124 electron microscopy (SEM) images of the PDMS mask are shown in Fig. 1.A and B. The  
125 mask was inverted and pressed onto the cell substrate. The assay was then exposed to air  
126 plasma (Fig. 1.C), thereby altering the surface charge of the areas exposed via the mask and  
127 thus increasing their hydrophilicity. The rest of the surface, covered by the adhered PDMS  
128 mask, remained in its original hydrophobic state. Subsequent incubation with Pluronic F127  
129 and Laminin (Fig. 1.D and E, respectively), resulted in 2 $\mu$ m-wide Laminin lines, alternating  
130 with 18 $\mu$ m-wide Pluronic F127-coated stripes (Fig. 1.F).

131 In order to obtain the second neurite geometry, the entire substrate was coated with the  
132 extracellular matrix (ECM) protein. PC12 cells were allowed to adhere on both substrates,  
133 as schematically shown in Fig. 1.G and I. Subsequently, the cells were differentiated to  
134 stimulate neurite growth (see Materials and Methods). Depending on the substrate used,  
135 patterned or un-patterned, the neurites either aligned along the lines or grew randomly on  
136 the 2D surface. Representative cells of both configurations are shown in Fig. 1.H and J,

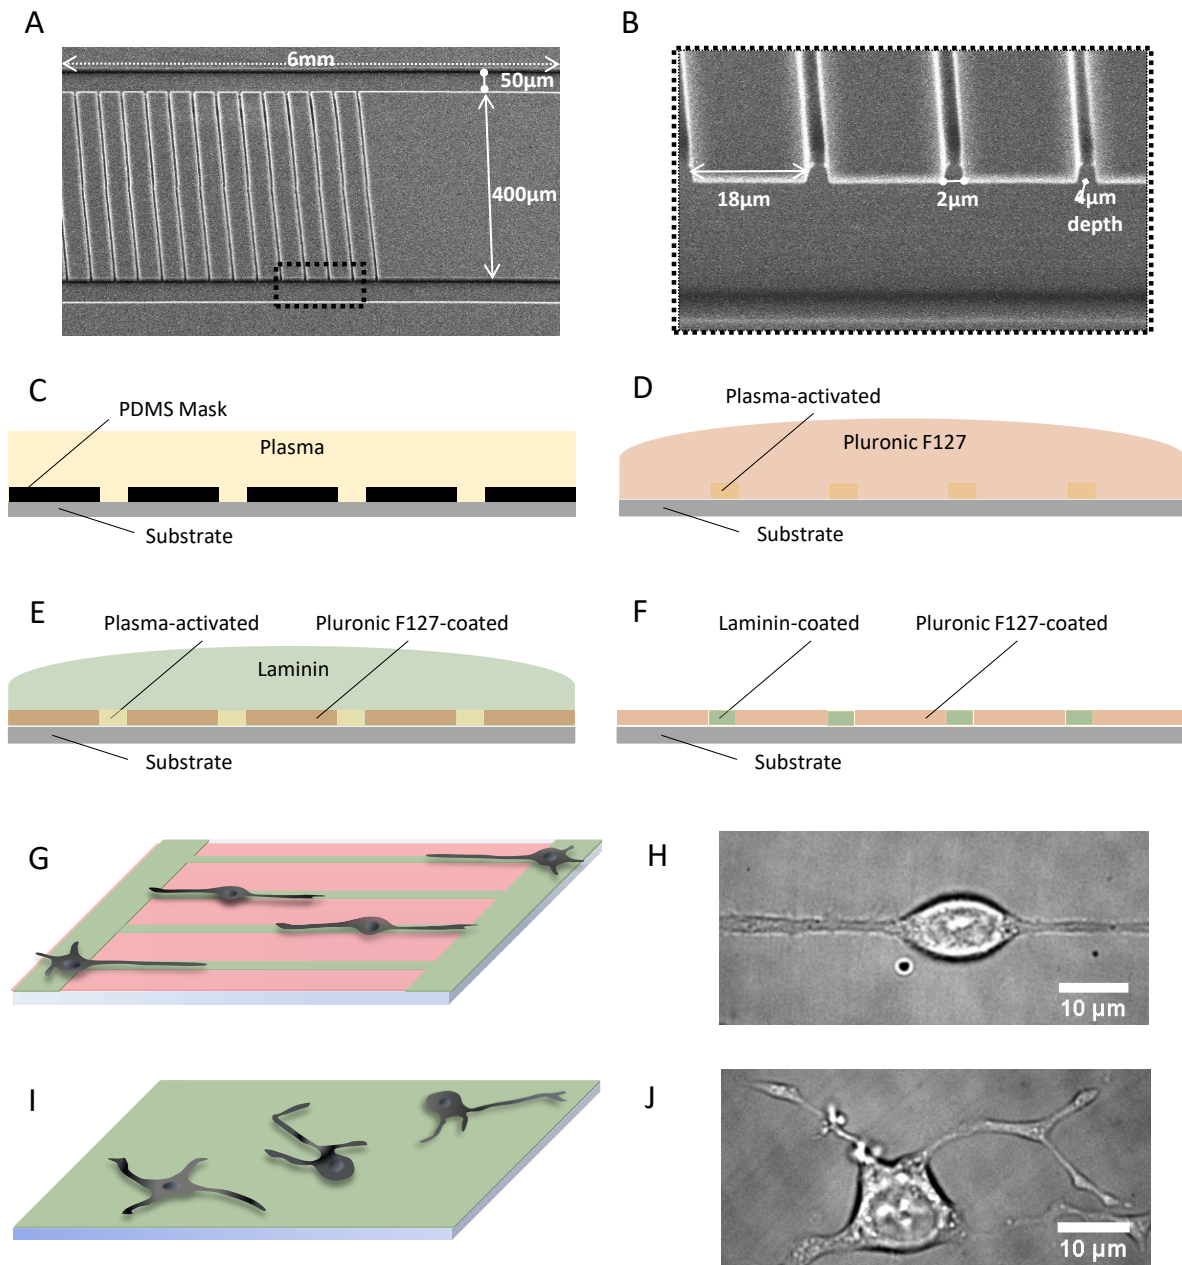

Figure 1: **Laminin  $\mu$ PIP for neurite guidance.** (A) Scanning electron microscopy (SEM) image of the PDMS mask used for the plasma-initiated patterning. The structure consisted of two side lines,  $50\mu\text{m}$ -wide and  $6\text{mm}$  long, with  $400\mu\text{m}$  distance in-between. The central  $2\text{mm}$  of the  $6\text{mm}$  blocks were intersected by  $2\mu\text{m}$ -wide lines, repeated every  $18\mu\text{m}$ . The depth of the mask was  $4\mu\text{m}$ . (B) Close-up of the area indicated by the black dotted-line square in (A). (C-F) Steps followed for the  $\mu$ PIP: (C) The PDMS mask was placed on the substrate, and the assay was exposed to air plasma. (D) The PDMS mask was removed and the substrate was submerged in Pluronic F127 which adsorbed to the plasma-protected areas. (E) The dish was immersed in Laminin, which adhered to the plasma-activated areas. (F) The resulting pattern of Laminin-coated lines surrounded by Pluronic-covered regions. (G) Schematic of the patterned substrate. Green color represents the ECM protein (Laminin) and red color the Pluronic F127. (H) Representative bright-field image of a differentiated PC12 cell on the patterned substrate, with its neurites aligned along the line. (I) Schematic of the un-patterned substrate, coated with Laminin (green color). (J) Representative bright-field image of a differentiated PC12 cell with the neurites randomly oriented on two-dimensions.



137 respectively.

## 138 **Sucrose induces lysosomal enlargement in differentiated PC12 cells.**

139 Next, we wondered whether a perturbation in the cellular environment, that associates with  
140 lysosomes, could be deciphered by studying their motion and, if that was the case, whether  
141 the effect would differ for the two different neurite configurations. To investigate that ques-  
142 tion, we employed sucrose-induced swelling of lysosomes. Sucrose has long been known to  
143 trigger swelling of lysosomes; it enters the cytoplasm by pinocytosis but can not be degraded  
144 by lysosomal enzymes, thus causing osmotic pressure alterations in lysosomes, which in turn,  
145 attempting to maintain osmotic balance, allow water influx, thus swelling (Warburton and  
146 Wynn 1976). Lysosome enlargement, along with its effect on lysosomal transport has been  
147 quantified in BS-C-1 monkey kidney epithelial cells (Bandyopadhyay et al. 2014).

148 Along the same lines, we incubated the differentiated PC12 cells with sucrose prior to  
149 data acquisition. Representative images of fluorescent lysosomes inside differentiated PC12  
150 cells in normal (control) media and in media containing sucrose are displayed in Fig. 2. A  
151 small effect on the size of the lysosomes can be observed by visual inspection. To quantify  
152 this, we measured the diameters of lysosomes for the two conditions and the distributions of  
153 the values, are shown in Fig. 2.E. The mean diameter was found to be equal to:

154  $\langle d_c \rangle = 0.82 \pm 0.02 \mu m$  for lysosomes of cells in normal media (control) and

155  $\langle d_s \rangle = 1.15 \pm 0.02 \mu m$  for lysosomes of cells in sucrose-containing media.

156 resulting in an increase of  $0.33 \mu m$  for the average lysosome diameter caused by incubation  
157 with sucrose.

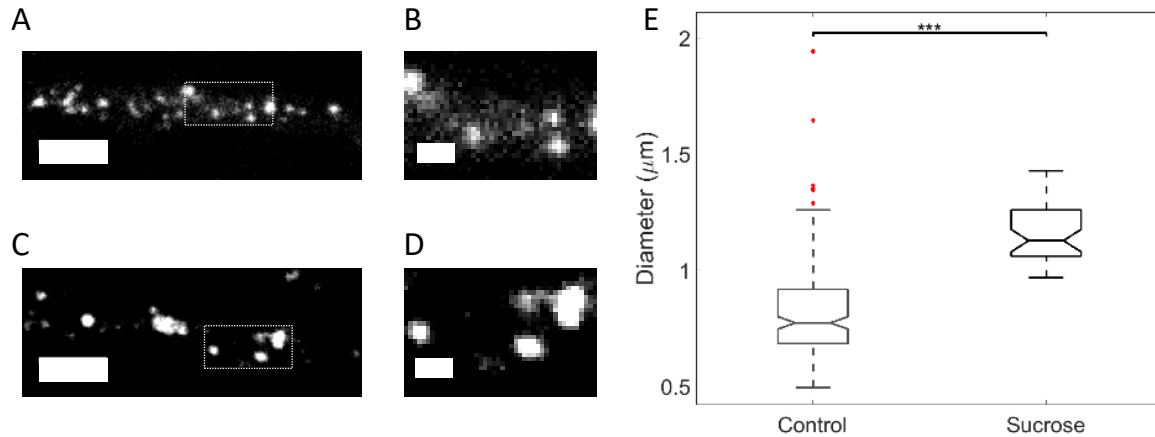

Figure 2: **Sucrose induces increase of lysosome diameter.** (A, B) Fluorescent lysosomes of a cell in media without sucrose (control). (C, D) Fluorescent lysosomes of a cell in media with sucrose. Scale bar in (A, C) is  $5\mu\text{m}$  and the square indicates the location shown in higher magnification in (B, D), respectively, with scale bar  $1\mu\text{m}$ . (E) Boxplot of lysosomes diameters for differentiated PC12 cells in media without sucrose (control) versus in media with sucrose, with mean values equal to  $\langle d_c \rangle = 0.82 \pm 0.02\mu\text{m}$  and  $\langle d_s \rangle = 1.15 \pm 0.02\mu\text{m}$  respectively. The statistical significance between the two means was determined using the Wilcoxon ranksum test; \*\*\* corresponds to  $p < 0.001$ .

## 158 **Lysosomes inside aligned neurites exhibit higher displacements.**

159 Fluorescently-labeled lysosomes were tracked for up to 30 seconds, inside both neurite con-  
160 figurations. The MSDs and JDD PDFs were calculated for all lysosomal trajectories of each  
161 condition (using eq. 5 and 10, respectively), for the x- and y- displacements, and are dis-  
162 played in Fig. 3. The x-axis coincided with the neurite alignment axis, in the corresponding  
163 experimental configuration.

164 As can be observed in Fig. 3.A, the MSD curve along the x- axis exhibits significantly  
165 higher values for lysosomes inside aligned neurites, especially for the control condition. It  
166 is noteworthy, that even in the presence of the sucrose-induced perturbation, the x-MSD  
167 values of lysosomes inside aligned neurites are higher than those of the control condition  
168 in randomly oriented neurites. Moreover, the decrease in the displacement observed in the

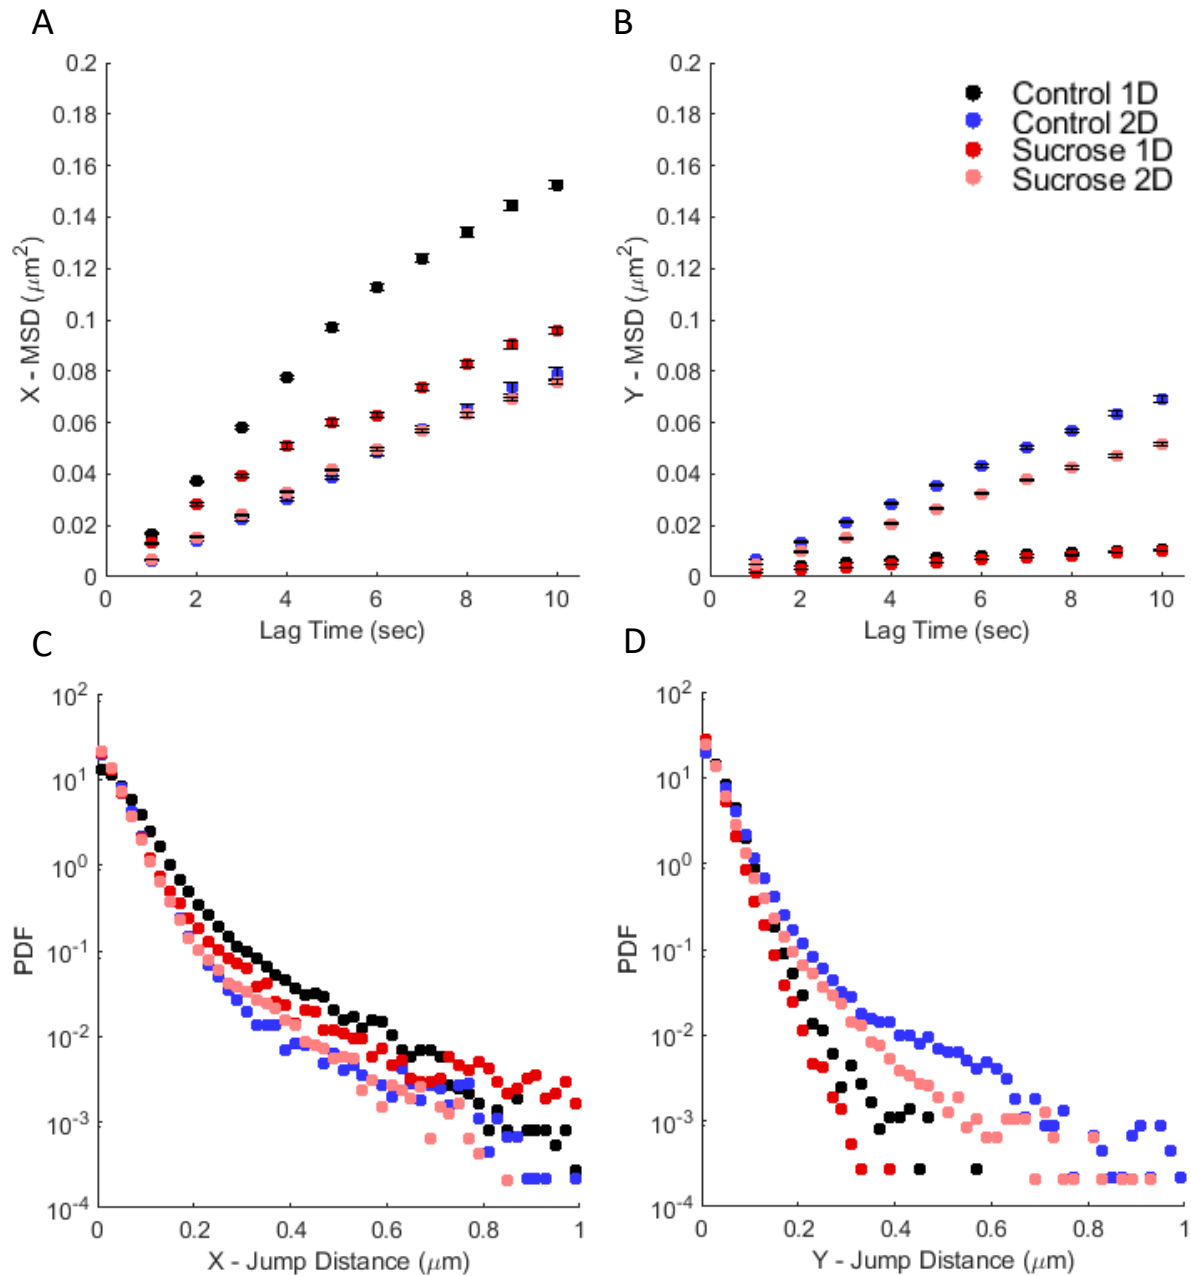

Figure 3: **Larger MSD and JDD PDF values observed for lysosomes moving inside aligned neurites.** (A) MSD curves along the x- axis and (B) MSD curves along the y- axis of lysosomal trajectories. Data points show time-averaged MSD  $\pm$  standard error of the mean. (C) JDD PDFs along the x- axis and (D) JDD PDFs along the y- axis of lysosomal trajectories. Color-coding indicates lysosomes inside aligned (1D) or randomly oriented (2D) neurites of differentiated PC12 cells in media without (control) or with sucrose.

169 presence of sucrose, is more significant for lysosomes inside aligned neurites, as compared  
170 to randomly oriented neurites. These findings are consistent with the JDD PDFs along the  
171 x-axis (Fig. 3.C).

172 The MSD and JDD PDF along the y-axis (Fig. 3.B and D) clearly indicate the underlying  
173 neurite alignment of the corresponding experimental condition. On the other hand, the y-  
174 MSD and JDD PDF values of lysosomes inside randomly oriented neurites, are similar to  
175 those for the x-axis. This result is expected, since there is no directionality preference for  
176 lysosomes moving inside randomly oriented neurites.

### 177 **Local MSD analysis of lysosomes trajectories distinguishes among** 178 **sub-diffusive, diffusive and super-diffusive motion modes.**

179 The shape of the MSD and JDD PDF curves presented in Fig. 3 indicates that the motion  
180 analyzed here consists of more than one type of transport, as explained previously. To  
181 characterize each transport mode, we performed a lMSD analysis for every single lysosomal  
182 trajectory. Previous studies have implemented this time-resolved analysis, however either  
183 distinguishing only between active and passive transport (Ahmed, Williams, et al. 2013;  
184 Ahmed and Saif 2014), or without afterwards analyzing collectively the trajectory parts of  
185 each motion category (Arcizet et al. 2008; Götz et al. 2015; Mahowald, Arcizet, and Heinrich  
186 2009).

187 Here, we differentiated among the three modes of lysosomal motion, characterized each  
188 trajectory data point, and subsequently analyzed collectively the trajectory parts of each  
189 motion type. Fig. 4.A shows the bright-field image of a differentiated cell, with its neurite  
190 aligned along the Laminin line, overlaid with recorded trajectories of lysosomes. Fig. 4.B  
191 displays the lysosomal trajectory indicated by the dotted black square in Fig. 4.A. The  
192 trajectory parts are color-coded, indicating either of sub-diffusive (black), diffusive (blue) and

193 super-diffusive (green) transport. For each mode of motion in this trajectory, the respective  
194 MSD curve is displayed in Fig. 4.C. In the same plot, dashed lines indicate theoretical MSD  
195 curves of super-diffusion ( $\alpha \sim 1.5$ ) and sub-diffusion ( $\alpha \sim 0.5$ ).

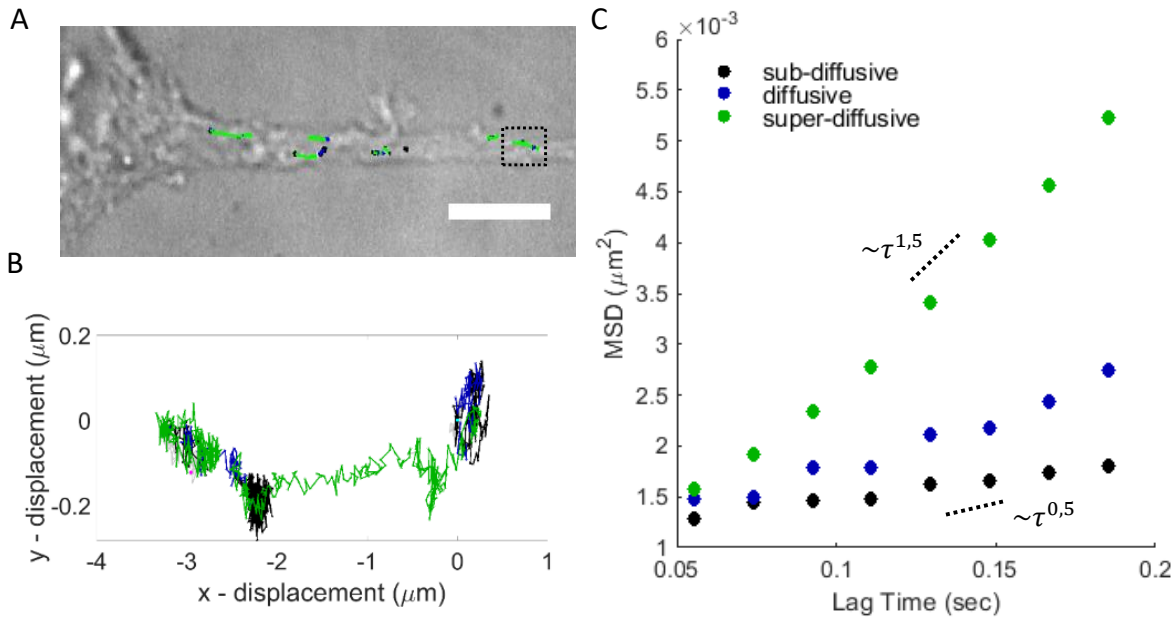

Figure 4: **Time-resolved characterization of motion, based on local MSD analysis.** (A) Bright-field image of a differentiated PC12 cell with its neurite aligned along the patterned Laminin line. Recorded trajectories of lysosomes are overlaid and color-coded based on the type of motion (sub-diffusive for  $\alpha \leq 0.9$ , diffusive for  $0.9 \leq \alpha \leq 1.1$  and super-diffusive for  $\alpha \geq 1.1$ ). The  $\alpha$  value was determined using the local MSD analysis. Scale bar equals  $100\mu\text{m}$ . (B) Close-up of the trajectory indicated by the black dotted square in (A). (C) Mean-squared displacement of the three motion modes, from the parts comprising the trajectory shown in (B). The dotted lines indicate the theoretical sub-diffusive ( $\alpha \sim 0.5$ ) and super-diffusive ( $\alpha \sim 1.5$ ) MSD curves.

196 **Neurite alignment associates with more efficient (sub-/ super-) dif-**  
197 **fusive transport of lysosomes.**

198 After characterizing every individual trajectory in a time-resolved manner using the I MSD  
199 analysis, we analyzed collectively all trajectory data points of each transport type. The  
200 MSD curves of the sub-diffusive, diffusive and super-diffusive parts of lysosomal trajectories  
201 in neurites of differentiated PC12 cells for the four experimental conditions, are displayed in  
202 Fig. 5. The sub-diffusive MSD curves were fitted using the power law describing anomalous  
203 diffusion (eq. 7). To fit the diffusive MSDs, the Brownian motion model was used (eq. 8).  
204 Lastly, for the super-diffusive MSDs we implemented the model of Brownian motion with  
205 drift (eq. 9) (Briane, Kervrann, and Vimond 2018). The resulting fitting parameters are  
206 summarized in Table S.1.

207 Lysosomes exhibit a higher (vectorial) mean-squared displacement inside aligned neurites  
208 than in randomly oriented neurites, for all three motion modes studied. This alignment-  
209 associated effect appears to be consistent also in the case of the sucrose-induced perturbation,  
210 except for the sub-diffusive trajectory modes. As the resulting experimental values indicate  
211 (Table S.1), the diffusion coefficient of the diffusive trajectory modes is higher for lysosomes  
212 inside aligned neurites, without or with the presence of the perturbation ( $0.0065 \mu m^2/sec$  and  
213  $0.0054 \mu m^2/sec$ , respectively) as compared to lysosomes inside randomly oriented neurites  
214 ( $0.0047 \mu m^2/sec$  and  $0.0029 \mu m^2/sec$ , respectively). Similarly, the drift velocity of the super-  
215 diffusive trajectory parts is higher for the lysosomes moving inside the aligned neurites, both  
216 in the media without and with sucrose ( $0.538 \mu m/sec$  and  $0.397 \mu m/sec$ , respectively), in  
217 comparison to the respective values for randomly oriented neurites ( $0.460 \mu m/sec$  and  $0.343$   
218  $\mu m/sec$ , respectively). These findings are in agreement with the results for the x- and y-  
219 axis presented in Fig. 3, further confirming the association between neurite alignment and  
220 larger lysosomal displacements.

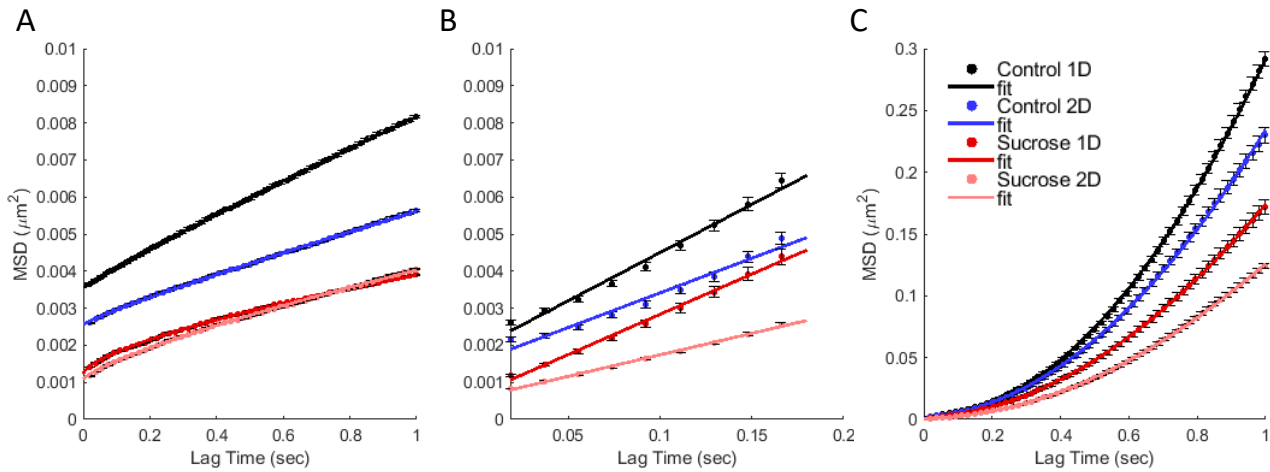

Figure 5: **MSD per transport mode.** (A) Sub-diffusive, (B) diffusive and (C) super-diffusive MSD plots of the respective lysosomal trajectories data points, as determined using the IMSD analysis. Color-coding indicates lysosomes inside aligned (1D) or randomly oriented (2D) neurites of differentiated PC12 cells in media without (control) or with sucrose.

## 221 **Sucrose accumulation enhances crowding in aligned neurites.**

222 The experimental value of the sub-diffusive  $\alpha$  exponent is found equal to 0.92 and 0.66 for  
223 lysosomes inside aligned neurites without and with sucrose, respectively. Thus, the decrease  
224 in the sub-diffusive  $\alpha$  value, attributed to sucrose accumulation, is approximately equal to  
225 0.26, that is twice the respective decrease observed inside randomly oriented neurites. The  
226 decrease in the diffusion coefficient, attributed to the incubation of the cells with sucrose,  
227 is approximately equal to 17% for lysosomes inside aligned neurites, almost half of the  
228 respective 35% for lysosomes inside randomly oriented neurites. Interestingly, our results  
229 indicate a sucrose-associated decrease in the drift velocity of the super-diffusive trajectory  
230 modes, approximately equal to 25%, which is the same for lysosomes inside both neurite  
231 configurations.

232 **Sucrose-induced lysosomal swelling results in proportionate decrease**  
233 **of the diffusion coefficient.**

234 Previously we found the mean diameter of lysosomes to be equal to  $\langle d_c \rangle = 0.82 \pm 0.02 \mu m$   
235 and  $\langle d_s \rangle = 1.15 \pm 0.02 \mu m$  for differentiated PC12 cells in media without sucrose (control)  
236 versus in media with sucrose, respectively (Figure 2.E). According to the Stokes-Einstein  
237 equation (Albert 1905), the diffusion coefficient  $D$  of a spherical particle with radius  $r$ ,  
238 through a liquid with low Reynolds number, is given by

$$D = \frac{k_B T}{6\pi\eta r} \quad (1)$$

239 where  $k_B$  the Boltzmann constant,  $T$  the temperature and  $\eta$  the viscosity. Assuming the  
240 temperature and viscosity remain constant, we expect the ratio of two diffusion coefficients  
241  $D_1$  and  $D_2$  of two particles to be analogous to the inverse ratio of their respective diameters  
242  $d_1$  and  $d_2$ :  $\frac{D_1}{D_2} = \frac{d_2}{d_1}$ . Thus, supposing there is no difference in the average temperature  
243 or viscosity of the cytoplasm between the cells in normal media and the cells in media  
244 containing sucrose, we expect the average diffusion coefficients and diameters of lysosomes  
245 in media without (control) versus with sucrose, to satisfy:

$$\frac{\langle d_s \rangle}{\langle d_c \rangle} = 1.4 = \frac{\langle D_c \rangle}{\langle D_s \rangle} \quad (2)$$

246 The experimental diffusion coefficients of the lysosomes inside cells in normal media and  
247 in sucrose-containing media, for the two configurations (Table S.1) yield:  $\left(\frac{\langle D_c \rangle}{\langle D_s \rangle}\right)_{1D} \approx 1.2$   
248 and  $\left(\frac{\langle D_c \rangle}{\langle D_s \rangle}\right)_{2D} \approx 1.7$ , a result close to the expected value, with the case of the aligned  
249 configuration exhibiting lower deviation from the expected result.



250 **JDD analysis yields same characteristic values as MSD analysis for**  
251 **diffusive motion modes.**

252 The JDD is increasingly used for the characterization of intracellular trajectories (Ahmed  
253 and Saif 2014; Grünwald et al. 2008; Gal, Lechtman-Goldstein, and Weihs 2013). Thus, as  
254 a last step of our analysis, we investigated how the results of these distributions and the  
255 characteristic values extracted from their fits relate to the respective ones extracted from  
256 the MSD analysis.

257 In Fig. 6, the X- and Y- MSD curves of the diffusive and super-diffusive parts of lysosomal  
258 trajectories in neurites of differentiated PC12 cells for the four experimental conditions are  
259 displayed, along with the fitting curves. The respective probability distribution functions  
260 and corresponding fitting curves of the jump distances along the X- and Y- axis are presented  
261 in Fig. 7. Consistent with the MSD, the JD displacement along the X- axis (same as the  
262 neurite alignment axis) is larger in the case of the aligned neurites, for both without and  
263 with sucrose incubation conditions. Additionally, incubation with sucrose appears to be  
264 associated with smaller displacements, as compared to the control case.

265 All diffusion coefficient and velocity values, resulting from the fits of the MSD and JDD  
266 curves are summarized in Table S.2 and S.3. It is remarkable how similar the resulting values  
267 of the X- and Y- component of the diffusion coefficient for the diffusive trajectory modes  
268 are. The resulting values of the X- component of the drift velocity of the super-diffusive  
269 trajectory modes exhibit small differences; the values extracted via fitting the JDD PDFs  
270 are systematically smaller than the respective ones derived from the MSD fits. This is of no  
271 surprise since, as can be seen, the fitting curves neglect the longer tails. However the trend  
272 observed among the experimental conditions is maintained: in the presence of sucrose the  
273 velocity is smaller than the control case, regardless the neurite configuration, and the 1D  
274 alignment indicates higher values than the random orientation case, regardless the presence

275 of the perturbation. The Y- component of the drift velocity of the super-diffusive trajectory  
276 modes, estimated via fitting the JDD PDF, deviates from the other values by two orders of  
277 magnitude.

## 278 Discussion

279 Cell survival, growth and conservation of homeostasis rest upon fine tuning and interplay of  
280 a plethora of processes. One such vital process is the transport of organelles, proteins or de-  
281 bris within the cellular environment. Malfunctioning intracellular motion is associated with  
282 neurodegenerative diseases (Aridor and Lisa A. Hannan 2000; Aridor and Lisa A Hannan  
283 2002; Sleight et al. 2019; Appert-Rolland, Ebbinghaus, and Santen 2015; De Vos and Hafez-  
284 parast 2017), emphasizing the significance of this process for neuronal cells more than other  
285 cell types. However, a deeper insight is of essence, to determine whether faulty intracellular  
286 transport underlies or gives rise to the pathology of these diseases.

287 Here, we employ a model system of neuron-like cells (Lloyd A Greene and Tischler 1976)  
288 to characterize the motion of lysosomes inside their neurites. As the cell shape affects the  
289 organization of the cytoskeleton and thereby the intracellular transport, we investigate this  
290 effect by guiding the neurites of differentiated PC12 cells towards two distinct geometries:  
291 either randomly oriented on a surface, or aligned along chemically-patterned lines. In par-  
292 allel, to mimic a pathological cellular phenotype, we perturb the cellular homeostasis via  
293 sucrose accumulation and induced lysosome swelling, and detect via motion analysis how its  
294 effect varies with the neurite geometry.

295 The overall MSD and JDD plots of lysosomal trajectories indicate enhanced transport  
296 when the neurites are aligned. The length scale of the observed trajectories is small, com-  
297 pared to the neurite width or curvature. Thus, this effect on the transport can be attributed  
298 to a global rearrangement of the cytoskeletal components, resulting from the alignment of

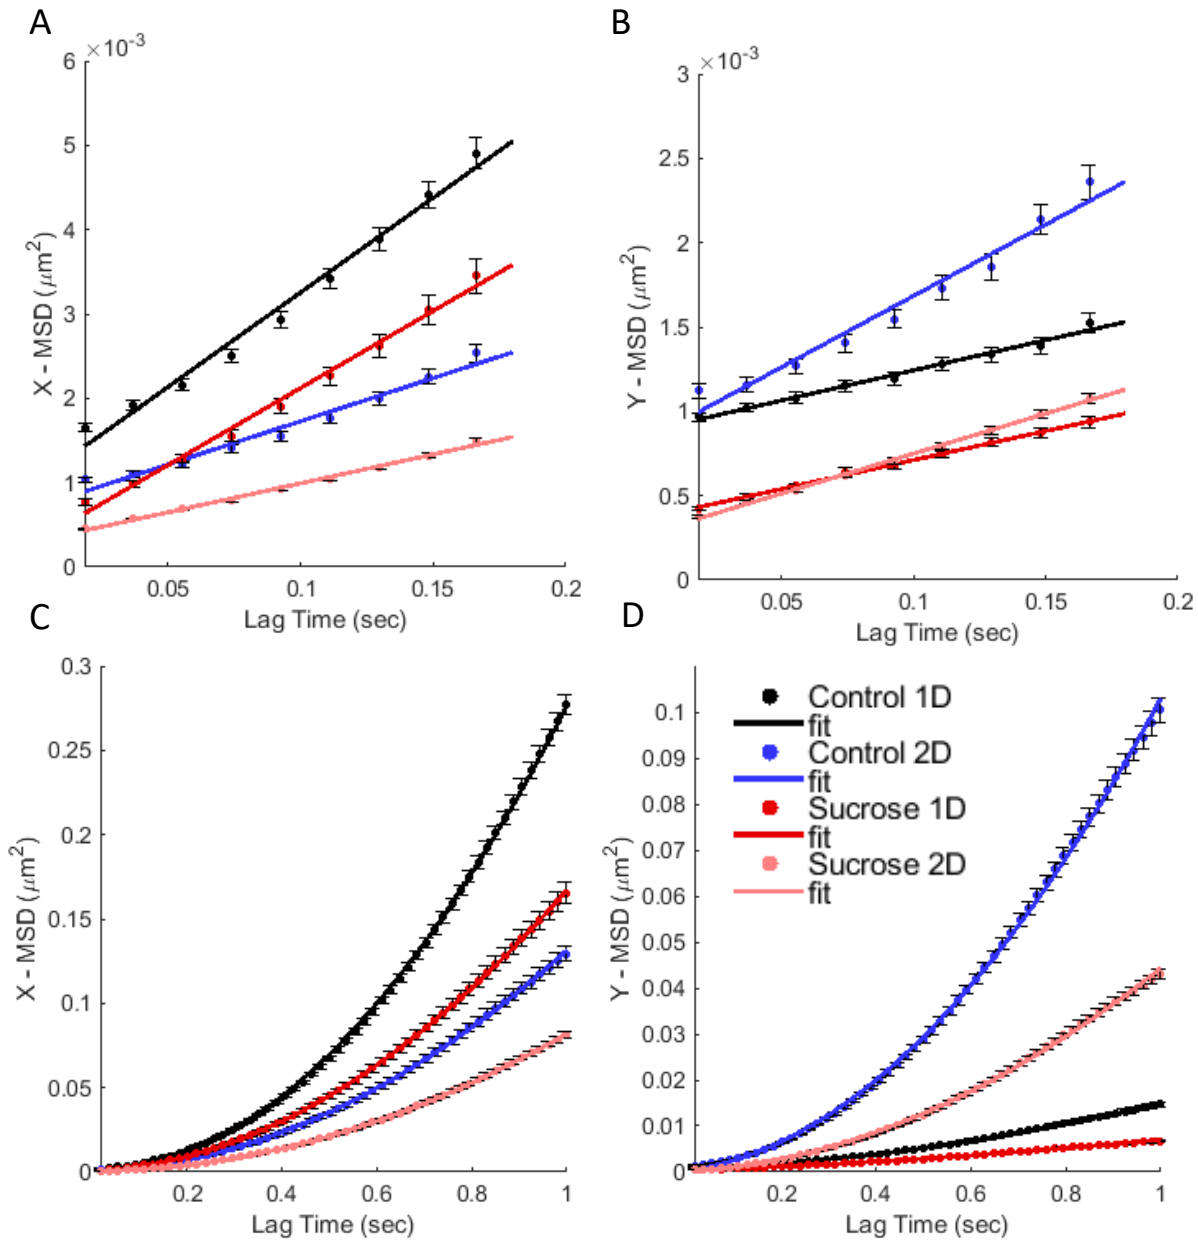

Figure 6: **X- and Y- MSDs of diffusive and super-diffusive trajectory parts.** MSDs calculated collectively for all diffusive trajectory parts along (A) the X- and (B) Y- axis. MSDs calculated collectively for all super-diffusive trajectory parts along (C) the X- and (D) Y- axis. Color coding indicates data of lysosomes inside aligned (1D) and randomly oriented (2D) neurites of differentiated PC12 cells in media without (control) or with sucrose. Diffusive MSDs (A, B) were fitted using equation 8. Super-diffusive MSDs (C, D) were fitted using equation 9. The fitting parameters are summarized in Table S.2.

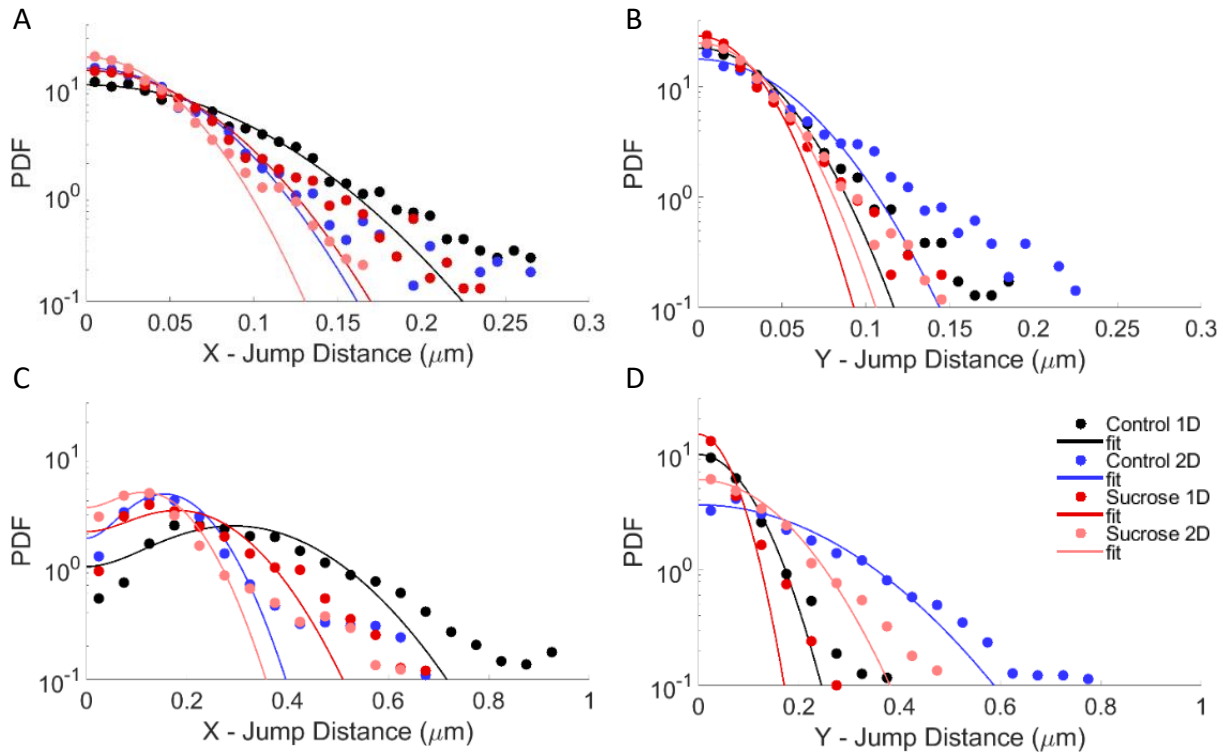

Figure 7: **X- and Y- JDD PDFs of diffusive and super-diffusive trajectory parts.** JDD PDFs calculated collectively for all diffusive trajectory parts along (A) the X- and (B) Y- axis, for  $\tau = 240.5ms$ . JDD PDFs calculated collectively for all super-diffusive trajectory parts along (C) the X- and (D) Y- axis, for  $\tau = 758.5ms$ . Color coding indicates data of lysosomes inside aligned (1D) and randomly oriented (2D) neurites of differentiated PC12 cells in media without (control) or with sucrose. Diffusive JDD PDFs (A, B) were fitted using equation 11. Super-diffusive JDD PDFs (C, D) were fitted using equation 12. The fitting parameters are summarized in Table S.3.

299 the neurites, confirming the hypothesis that the cell shape impacts intracellular transport.

300 Implementing local MSD analysis, we separately characterize the sub-diffusive, diffusive  
301 and super-diffusive transport phases of the recorded lysosomal trajectories (Arcizet et al.  
302 2008; Mahowald, Arcizet, and Heinrich 2009; Götz et al. 2015). We find that both diffusive  
303 and super-diffusive motion of lysosomes is enhanced inside aligned neurites. In addition,  
304 this result is maintained in the case where the homeostasis has been impaired via sucrose  
305 incubation, suggesting a global effect of neurite alignment on organelle transport. For the  
306 sub-diffusive trajectory parts, the difference is smaller, as seen from the alpha-exponent  
307 values of the MSD curves fits, which are slightly larger for lysosomes inside aligned neurites.  
308 Our findings complement previous studies, which used lMSD analysis to investigate the  
309 effect of cytoskeleton organization on intracellular dynamics of *Dictyostellium Discoideum*  
310 cells (Otten et al. 2012; Götz et al. 2015; Grady et al. 2017; Mahowald, Arcizet, and Heinrich  
311 2009), demonstrating the potential of this analysis also for mammalian intracellular organelle  
312 motion.

313 In addition, we confirm that sucrose induces swelling of lysosomes inside differentiated  
314 PC12 cells with an associated increase of their average diameter by  $0.33 \mu\text{m}$ , and this leads  
315 to a proportionate decrease in their diffusion coefficient, as estimated by fitting the MSD  
316 curves of the diffusive trajectory modes. However, the neurite alignment seems to alleviate  
317 the sucrose effect in the case of the diffusive motion, resulting in half the respective decrease  
318 of the diffusion coefficient of lysosomes inside non-aligned neurites. Contrary to the findings  
319 reported by Bandyopadhyay et. al. (Bandyopadhyay et al. 2014), our analysis indicates a  
320 sucrose-associated decrease in the drift velocity of the super-diffusive transport modes, same  
321 for both neurite configurations. Furthermore, our results reveal a decrease in the alpha-  
322 exponent of the sub-diffusive trajectory modes, suggesting a crowding effect due to sucrose  
323 incubation (Weiss et al. 2004), more prominent inside aligned neurites.

324 Lastly, the JDD analysis of the diffusive motion modes resulted in values surprisingly

325 close to the respective ones extracted from the MSD analysis. This was not the case for  
326 the super-diffusive trajectory parts, where the resulting values deviated significantly from  
327 the respective ones estimated using the MSD curve fitting. In future studies, it would be  
328 interesting to investigate whether this might be resolved after further discrimination of super-  
329 diffusive trajectory parts with  $\alpha$  values between 1.1 and  $\sim 1.7$  and active transport parts,  
330 with  $\alpha$  values  $\sim 2 \pm 0.3$ , as the long tails in the JDD PDFs are neglected in the fits.

331 In summary, the experiments presented here are the first to quantitatively characterize  
332 the motion of functional organelles inside neurites of two different geometries, and compare  
333 the effect of sucrose-induced swelling on lysosomal motion, inside each neurite configura-  
334 tion and for each of the three transport modes. We confirm that the dimensionality of the  
335 neurites distinctly affects lysosome transport, with a positive correlation between 1D- neu-  
336 rite alignment, and higher diffusion coefficient and drift velocity of the lysosomal motion  
337 modes. Additionally we show that disruption of homeostasis via sucrose accumulation and  
338 induced lysosomal swelling, has larger effect when the motion occurs inside randomly ori-  
339 ented neurites. Our findings imply that, in physiological conditions, alterations in the ECM  
340 organization, which could for instance cause more branching of neurons' axons, may enhance  
341 potential intracellular disrupted homeostasis, leading faster to pathological phenotypes. It  
342 would be interesting, in future research, to investigate the interplay between cell geometry  
343 and disease onset.

## 344 **Materials and Methods**

### 345 **Laminin $\mu$ PIP**

346 The mold for the patterning mask was fabricated with a Nanoscribe Photonic professional  
347 GT 3D laser printer (Nanoscribe, Germany), with two-photon polymerization (2PP) of IP-S  
348 photoresist (Nanoscribe n.d.). Prior to first use and after each subsequent use, a layer of  
349 trichloro(1H,1H,2H,2H-perfluorooctyl)silane, (Sigma-Aldrich) was deposited on the silicon  
350 mold (silanization), to reduce stiction (Srinivasan et al. 1998).

351 Poly dimethyl-siloxane (PDMS, Sylgard 184, Dow Corning, USA) was prepared by mixing  
352 the cross-linking agent with the elastomer base at a ratio of 1:10. The mixture was pipetted  
353 on the silicon mold and allowed to cross-link for 1 hour at 120°C. Subsequently, the hardened  
354 PDMS bearing the structure was peeled from the wafer.

355 For Plasma-Initiated Patterning, the PDMS mask was placed on an ibidi dish (ibidi  
356 GMBH,  $\mu$ -Dish, 35 mm high, polymer coverslip bottom), with the structure-bearing side  
357 adherent to the bottom of the dish and was exposed to air plasma for 6 min 20 sec at 100  
358 Watts (Diener Electronic Femto Plasma system).

359 Subsequently, the PDMS mask was removed and the substrate was flooded with 0.1%  
360 Pluronic F127 (Sigma-Aldrich) diluted in Phosphate Buffer Saline (PBS) for 45 minutes  
361 at room temperature. The dish was then washed 3 times with PBS and once with RPMI  
362 (Gibco™) and subsequently incubated with 25 $\mu$ g/ml Laminin (Sigma-Aldrich) diluted in  
363 RPMI, for 1 hour at 37°C. Prior to seeding cells, the substrate was washed 3 times with  
364 RPMI.

### 365 **Cell Culture**

366 PC12 cells (CH3 BioSystems) were cultured in dishes coated with rat-tail Collagen (CH3  
367 BioSystems). Their growth medium consisted of 85% RPMI-1640 with Glutamax (Gibco™),

368 10% heat-inactivated Horse Serum (HS) (Sigma-Aldrich), 5% Fetal Calf Serum Heat Inacti-  
369 vated (FCS HI, Thermo Scientific) and 200 $\mu$ g/mL penicillin/streptomycin (PS). Media were  
370 refreshed three times per week, and the cells were split once per week at ratio 1:3-1:6. The  
371 cells were kept at 37°C and 5% CO<sub>2</sub> in humidified atmosphere.

372 To induce differentiation, PC12 cells were seeded in ibidi uncoated dishes (ibidi GMBH,  
373  $\mu$ -Dish, 35 mm high) coated with Laminin (Sigma-Aldrich). For whole surface Laminin  
374 coating, the dish was exposed to air plasma for 6 min 20 sec at 100Watts (Diener Electronic  
375 Femto Plasma system). Subsequently, the dish was incubated for 1 hour at 37°C and 5%  
376 CO<sub>2</sub> with 25  $\mu$ g/ml Laminin diluted in RPMI.

377 Cells were seeded at a density of 30.000 cells/cm<sup>2</sup> in full media and after they had adhered,  
378 they were washed once with PBS and then the media were replaced with differentiation  
379 media consisting of Opti-MEM<sup>TM</sup> Reduced Serum Medium (Gibco<sup>TM</sup>) supplemented with  
380 0.5% Fetal Bovine Serum (Gibco<sup>TM</sup>) and Nerve Growth Factor (NGF-2.5S Sigma-Aldrich)  
381 at final concentration of 100ng/ml. The differentiation media were refreshed three times per  
382 week.

383 To induce swelling of lysosomes, 50mM sucrose (Sigma-Aldrich) was added in the differ-  
384 entiation media 18 hours before imaging. At the end of the incubation, the cells were washed  
385 once with PBS and submerged again in normal culture or differentiation media.

386 Prior to imaging, the cells were incubated with 50-150nM LysoTracker (Invitrogen<sup>TM</sup>) in  
387 RPMI for 30 minutes.

## 388 **Optical Microscopy**

389 Optical microscopy images were acquired with a Nikon Ti Eclipse inverted microscope  
390 (NIKON corporation, Japan) equipped with a Yokogawa CSU-X1 spinning disc unit (10,000rpm,  
391 Andor Technology Ltd., United Kingdom). The samples were imaged with a 100x objec-  
392 tive (Nikon CFI Plan Apo Lamda, NA 1.45). Excitation at 405nm, 488nm and 647nm was



393 achieved via an Agilent MLC400 monolithic laser combiner (Agilent Technologies, Nether-  
394 lands). The excitation light was filtered by a custom-made Semrock quad-band dichroic  
395 mirror for excitation wavelengths 400-410, 486-491, 460-570, and 633-647nm. The emit-  
396 ted light was filtered using a Semrock quad-band fluorescence filter (TR-F440-521-607-700),  
397 which has specific transmission bands at  $440\pm 40\text{nm}$ ,  $521\pm 21\text{nm}$ ,  $607\pm 34\text{nm}$  and  $700\pm 45\text{nm}$   
398 and by Semrock Brightline single band fluorescence filters at  $447\pm 60\text{nm}$  (TR-F447-060) and  
399  $525\pm 60\text{nm}$  (TR-F525-030). Images were captured with an Andor iXon Ultra 897 High-speed  
400 EM-CCD camera. Image acquisition was automated using NisElements software (LIM, Czech  
401 Republic). Time-lapse images were acquired every 18 ms, for up to 30 seconds. During data  
402 acquisition, the cells were kept in a humidified atmosphere at  $37^\circ\text{C}$  and supplied with 5%  
403  $\text{CO}_2$  via the use of a Tokai Hit stage incubator.

## 404 Data Analysis

405 The Feret diameter of lysosomes was calculated using FIJI (Schindelin et al. 2012). The  
406 selection of lysosomes in untreated cells was performed using an area mask between  $0.1\mu\text{m}^2$   
407 and  $1.5\mu\text{m}^2$ . Lysosomes in cells that had been treated with sucrose were selected with a  
408 mask of area between  $0.5\mu\text{m}^2$  and  $5.0\mu\text{m}^2$ . Threshold values were the same for all images  
409 and clustered lysosomes were discarded from the analysis.

410 Trajectories of fluorescent lysosomes were tracked using the FIJI plugin, TrackMate (Tin-  
411 evez et al. 2017), which returned the  $x$ - and  $y$ -coordinates of the center of the lysosomes,  
412 with a sub-pixel localization. During the tracking we included all three populations of  
413 lysosomes: those that appeared to be confined, diffusive and motile, with bigger (motor-  
414 mediated) displacements.

415 Further processing was performed using home-made Matlab algorithms. The  $x$ - and  $y$ -  
416 coordinates as a function of time for each trajectory were represented by a series of vectors

417 at each time point  $t$ :

$$\mathbf{r}(t) = x(t) + y(t) \quad (3)$$

418 and the displacement  $\Delta\mathbf{r}$  at time  $t$  was calculated as follows:

$$\Delta\mathbf{r}(t) = \mathbf{r}(t + \Delta t) - \mathbf{r}(t) \quad (4)$$

419 where  $\Delta t$  is the inverse frame rate.

420 The Mean Squared Displacement (MSD) for lag time  $\tau = k\Delta t$  was calculated according  
421 to:

$$MSD(\tau) = \langle \Delta\mathbf{r}^2(\tau) \rangle = \frac{1}{N-k} \sum_{i=1}^{N-k} (\mathbf{r}(t_i + \tau) - \mathbf{r}(t_i))^2 \quad (5)$$

422 where  $N$  the number of data points in the trajectory and  $k = 1, 2, \dots, N - 1$ . The average  
423 MSD per condition is the average of the squared displacements of all lysosome trajectories  
424 for each lag time  $\tau$ .

425 The local Mean Squared Displacement (lMSD) was calculated for each trajectory as  
426 described previously (Arcizet et al. 2008). Briefly, the MSD was calculated for each data  
427 point of the entire trajectory using a rolling window of 2.22 seconds ( $N=120$ , in eq. 5) and  
428 fitted for the interval 0-555ms ( $k=30$  in eq. 5) with a power law:

$$MSD(\tau) = A\tau^\alpha \quad (6)$$

429 The alpha exponent as a function of time was subsequently used to partition the transport  
430 states as sub-diffusive for  $\alpha < 0.9$ , diffusive for  $0.9 \leq \alpha \leq 1.1$ , or super-diffusive for  $\alpha > 1.1$ .

431 In order to characterize more closely each type of motion, we analyzed collectively the  
432 respective trajectory parts, for each experimental condition (cells in media without (control)  
433 or with sucrose and in neurites that were aligned or randomly oriented).

434 The average MSD curve for each motion mode was calculated again according to eq. 5.

435 The sub-diffusive trajectory modes MSD was fitted with the power law describing anomalous  
436 diffusion

$$MSD(\tau) = A\tau^\alpha + 2d\sigma^2 \quad (7)$$

437 thereby obtaining the value of the anomalous  $\alpha$  exponent (A is a constant). The MSD curve  
438 was fitted for all lag times (up to 30 sec).

439 The diffusive trajectory modes MSD was fitted using the equation describing Brownian  
440 motion

$$MSD(\tau) = 2dD\tau + 2d\sigma^2 \quad (8)$$

441 thus extracting the experimental value of the diffusion coefficient D. The MSD curve was  
442 fitted for lag times 1 to 10 (18.5-185 ms).

443 The super-diffusive trajectory modes MSD was fitted using the model of Brownian motion  
444 with drift (Briane, Vimond, and Kervrann 2019).

$$MSD(\tau) = 2dD_{eff}\tau + V_{drift}^2\tau^2 + 2d\sigma^2 \quad (9)$$

445 where  $V_{drift}$ , the constant drift parameter models the velocity of the molecular motors. The  
446 MSD curve was fitted for lag times 1 to 55 (0.0185-1 sec).

447 In equations 7, 8 and 9  $\sigma$  is the localization precision,  $\tau$  the lag time and the parameter  
448  $d$  refers to the dimensionality.  $d$  was set equal to 1 for the fit of the MSD along the  $x$ - or  $y$ -  
449 axis, and equal to 2 for the fit of the 2D- MSD curve.

450 The Jump Distance Distribution (JDD) was calculated according to the self-part of the  
451 van Hove correlation function (Van Hove 1954):

$$G_s(\Delta\mathbf{r}, \tau) = \frac{1}{k} \sum_{i=1}^k \langle \delta(\Delta\mathbf{r} - \mathbf{r}(t_i + \tau) + \mathbf{r}(t_i)) \rangle \quad (10)$$

452 for displacements in both the  $x$ - and  $y$ - direction, and a specific lag time  $\tau$ .  $\delta$  here denotes

453 the Dirac delta function in two dimensions and  $k = 1, 2, \dots, N - 1$ , with  $N$  the number of  
454 data points in the trajectory. The bin size was (arbitrarily) set to  $1\mu m$  and the JDD was  
455 normalized into a probability density function.

456 The diffusive and super-diffusive trajectory parts for each experimental condition were  
457 used to calculate the respective JDD PDF, for lag times of 0.2405 ms and 0.7585 ms re-  
458 spectively. The PDFs were fitted to extract characteristic values of the motion, using the  
459 analytical expressions calculated in (Menssen and Mani 2019). Particularly, the diffusive  
460 trajectory modes JDD PDF was fitted for the x- direction, using

$$JDD_{PDF} = \frac{1}{\sqrt{\pi D \tau}} \exp\left(\frac{-x^2}{4D\tau}\right) \quad (11)$$

461 thereby estimating the experimental value of the diffusion coefficient  $D$ . Similarly, for the  
462 y-direction. The super-diffusive trajectory modes JDD PDF was fitted for the x- direction,  
463 using

$$JDD_{PDF} = \frac{1}{\sqrt{4\pi D_{eff}\tau}} \exp\left(\frac{-x^2 + V_{drift}^2 \tau^2}{4D_{eff}\tau}\right) \left( \exp\left(\frac{V_{drift}x}{2D_{eff}}\right) + \exp\left(\frac{-V_{drift}x}{2D_{eff}}\right) \right) \quad (12)$$

464 estimating the experimental value of the drift velocity  $V_{drift}$  and effective diffusion coefficient  
465  $D_{eff}$ . Likewise for the y-direction.

466 **Supplementary Information**

| Motion mode | Sub-diffusive        | Diffusive            | Super-diffusive             |                             |
|-------------|----------------------|----------------------|-----------------------------|-----------------------------|
|             | $\alpha$ exponent    | D ( $\mu m^2/sec$ )  | $V_{drift}$ ( $\mu m/sec$ ) | $D_{eff}$ ( $\mu m^2/sec$ ) |
| Control 1D  | $0.92 \pm 0.01$      | $0.0065 \pm 0.0013$  | $0.538 \pm 0.008$           | $5E - 8 \pm 0.002$          |
| Control 2D  | $0.90 \pm 0.03$      | $0.0047 \pm 0.0015$  | $0.460 \pm 0.010$           | $0.005 \pm 0.002$           |
| Sucrose 1D  | $0.66 \pm 0.03$      | $0.0054 \pm 0.0007$  | $0.397 \pm 0.004$           | $0.004 \pm 0.001$           |
| Sucrose 2D  | $0.77 \pm 0.03$      | $0.0029 \pm 0.0003$  | $0.343 \pm 0.006$           | $0.002 \pm 0.001$           |
|             | $\sigma$ ( $\mu m$ ) | $\sigma$ ( $\mu m$ ) | $\sigma$ ( $\mu m$ )        |                             |
| Control 1D  | $0.030 \pm 0.003$    | $0.022 \pm 0.012$    | $0.022 \pm 0.022$           |                             |
| Control 2D  | $0.025 \pm 0.003$    | $0.020 \pm 0.012$    | $0.016 \pm 0.028$           |                             |
| Sucrose 1D  | $0.018 \pm 0.004$    | $0.013 \pm 0.009$    | $0.015 \pm 0.014$           |                             |
| Sucrose 2D  | $0.016 \pm 0.004$    | $0.012 \pm 0.005$    | $0.011 \pm 0.015$           |                             |

Table S.1: Motion parameters resulting from fitting the sub-diffusive, diffusive and super-diffusive trajectory parts MSD curves (demonstrated in Fig. 5), using eq. 7, 8, and 9, respectively.

| Motion mode | Diffusive           |                      | Super-diffusive             |                             |                      |
|-------------|---------------------|----------------------|-----------------------------|-----------------------------|----------------------|
|             | D ( $\mu m^2/sec$ ) | $\sigma$ ( $\mu m$ ) | $V_{drift}$ ( $\mu m/sec$ ) | $D_{eff}$ ( $\mu m^2/sec$ ) | $\sigma$ ( $\mu m$ ) |
| X- MSD      |                     |                      |                             |                             |                      |
| Control 1D  | $0.0112 \pm 0.0025$ | $0.016 \pm 0.011$    | $0.525 \pm 0.002$           | $2E - 9 \pm 1E - 9$         | $0.012 \pm 0.017$    |
| Control 2D  | $0.0051 \pm 0.0015$ | $0.013 \pm 0.009$    | $0.351 \pm 0.006$           | $0.004 \pm 0.002$           | $0.014 \pm 0.015$    |
| Sucrose 1D  | $0.0091 \pm 0.0015$ | $0.009 \pm 0.009$    | $0.393 \pm 0.004$           | $0.006 \pm 0.001$           | $0.013 \pm 0.013$    |
| Sucrose 2D  | $0.0034 \pm 0.0004$ | $0.009 \pm 0.004$    | $0.283 \pm 0.002$           | $0.001 \pm 0.001$           | $0.011 \pm 0.009$    |
| Y- MSD      |                     |                      |                             |                             |                      |
| Control 1D  | $0.0018 \pm 0.0004$ | $0.015 \pm 0.004$    | $0.103 \pm 0.003$           | $0.002 \pm 0.0003$          | $0.014 \pm 0.005$    |
| Control 2D  | $0.0042 \pm 0.0014$ | $0.014 \pm 0.008$    | $0.298 \pm 0.009$           | $0.007 \pm 0.003$           | $0.007 \pm 0.018$    |
| Sucrose 1D  | $0.0017 \pm 0.0002$ | $0.010 \pm 0.003$    | $0.057 \pm 0.005$           | $0.002 \pm 0.0003$          | $0.010 \pm 0.006$    |
| Sucrose 2D  | $0.0024 \pm 0.0002$ | $0.008 \pm 0.003$    | $0.195 \pm 0.007$           | $0.003 \pm 0.001$           | $0.0001 \pm 0.013$   |

Table S.2: Motion parameters resulting from fitting the diffusive and super-diffusive trajectory parts x- and y- MSD curves (demonstrated in Fig. 6), using eq. 8 and 9.

| Motion mode | Diffusive           | Super-diffusive             |                             |
|-------------|---------------------|-----------------------------|-----------------------------|
|             | D ( $\mu m^2/sec$ ) | $V_{drift}$ ( $\mu m/sec$ ) | $D_{eff}$ ( $\mu m^2/sec$ ) |
| X - JDD     |                     |                             |                             |
| Control 1D  | $0.0112 \pm 0.0016$ | $0.388 \pm 0.060$           | $0.019 \pm 0.009$           |
| Control 2D  | $0.0054 \pm 0.0006$ | $0.205 \pm 0.024$           | $0.005 \pm 0.002$           |
| Sucrose 1D  | $0.0060 \pm 0.0007$ | $0.243 \pm 0.055$           | $0.010 \pm 0.007$           |
| Sucrose 2D  | $0.0033 \pm 0.0003$ | $0.158 \pm 0.026$           | $0.005 \pm 0.002$           |
| Y - JDD     |                     |                             |                             |
| Control 1D  | $0.0026 \pm 0.0003$ | $0.001 \pm 17931$           | $0.004 \pm 12.785$          |
| Control 2D  | $0.0042 \pm 0.0009$ | $0.007 \pm 5425$            | $0.032 \pm 30.580$          |
| Sucrose 1D  | $0.0016 \pm 0.0007$ | $0.001 \pm 3958$            | $0.002 \pm 3.556$           |
| Sucrose 2D  | $0.0021 \pm 0.0002$ | $0.001 \pm 79828$           | $0.012 \pm 78.405$          |

Table S.3: Motion parameters resulting from fitting the diffusive and super-diffusive trajectory parts x- and y- JDD PDFs (demonstrated in Fig. 7), using eq. 11 and 12.

|            | # Cells | # Trajectories | # Data Points |
|------------|---------|----------------|---------------|
| Control 1D | 19      | 167            | 188542        |
| Control 2D | 16      | 178            | 230196        |
| Sucrose 1D | 7       | 128            | 188494        |
| Sucrose 2D | 9       | 160            | 241500        |

Table S.4: **Data Statistics.** Number of cells imaged, number of total lysosomal trajectories tracked and number of total data points per experimental condition (differentiated PC12 cells in media without (control) and with sucrose, with their neurites aligned (1D) or randomly oriented (2D)).

|            | Sub-diffusive |               | Diffusive |               | Super-diffusive |               |
|------------|---------------|---------------|-----------|---------------|-----------------|---------------|
|            | # Modes       | # Data Points | # Modes   | # Data Points | # Modes         | # Data Points |
| Control 1D | 352           | 154732        | 334       | 5484          | 135             | 8254          |
| Control 2D | 307           | 196326        | 257       | 4504          | 117             | 8029          |
| Sucrose 1D | 365           | 154513        | 426       | 7110          | 185             | 10941         |
| Sucrose 2D | 600           | 187570        | 777       | 14336         | 323             | 20111         |

Table S.5: **Data Statistics of trajectories modes.** Number of trajectory modes and number of total data points falling for each transport category (sub-diffusive, diffusive and super-diffusive), as determined with lMSD analysis.

## 467 Acknowledgments

468 The authors would like to acknowledge the Fraunhofer Gesellschaft for the Fraunhofer Attract  
469 grant “3D NanoCell”.

## 470 Conflict of Interests

471 None

## 472 Funding

473 The research was funded by the Fraunhofer Attract grant “3D NanoCell”.

## 474 References

- 475 Ahmed, Wylie W. and Taher A. Saif (2014). “Active transport of vesicles in neurons is  
476 modulated by mechanical tension”. In: *Sci. Rep.* 4.4481. DOI: 10.1038/srep04481.
- 477 Ahmed, Wylie W., Brian J. Williams, et al. (2013). “Measuring nonequilibrium vesicle  
478 dynamics in neurons under tension”. In: *Lab Chip* 13.4, pp. 570–578. DOI: 10.1039/  
479 c2lc41109a.
- 480 Albert, Einstein (1905). *Über die von der molekularkinetischen Theorie der Wärme geforderte*  
481 *Bewegung von in ruhenden Flüssigkeiten suspendierten Teilchen.*
- 482 Amick, Joseph and Shawn M. Ferguson (2017). “C9orf72: At the intersection of lysosome  
483 cell biology and neurodegenerative disease”. In: *Traffic* 18.5, pp. 267–276. DOI: 10.1111/  
484 tra.12477.
- 485 Appert-Rolland, C., M. Ebbinghaus, and L. Santen (2015). “Intracellular transport driven  
486 by cytoskeletal motors: General mechanisms and defects”. In: *Phys. Rep.* 593, pp. 1–59.  
487 DOI: 10.1016/j.physrep.2015.07.001.
- 488 Arcizet, Delphine et al. (2008). “Temporal analysis of active and passive transport in living  
489 cells”. In: *Phys. Rev. Lett.* 101.24, p. 248103. DOI: 10.1103/PhysRevLett.101.248103.
- 490 Aridor, Meir and Lisa A Hannan (2002). “Traffic jams II: an update of diseases of intracellular  
491 transport.” In: *Traffic* 3.11, pp. 781–790. DOI: 10.1034/j.1600-0854.2002.31103.x.
- 492 — (2000). “Traffic Jam: A Compendium of Human Diseases that Affect Intracellular Trans-  
493 port Processes”. In: *Traffic* 1.11, pp. 836–851. DOI: 10.1034/j.1600-0854.2000.011104.x.
- 494 Bandyopadhyay, Debjyoti et al. (2014). “Lysosome transport as a function of lysosome di-  
495 ameter”. In: *PLoS One* 9, e86847. DOI: 10.1371/journal.pone.0086847.
- 496 Bhowmik, Bhanu Prasad, Indrajit Tah, and Smarajit Karmakar (2018). “Non-Gaussianity  
497 of the van Hove function and dynamic-heterogeneity length scale”. In: *Phys. Rev. E* 98.2,  
498 p. 022122. DOI: 10.1103/PhysRevE.98.022122.



- 499 Bressloff, Paul C. and Jay M. Newby (2013). “Stochastic models of intracellular transport”.  
500 In: *Rev. Mod. Phys.* 85.1, pp. 135–196. DOI: 10.1103/RevModPhys.85.135.
- 501 Briane, Vincent, Charles Kervrann, and Myriam Vimond (2018). “Statistical analysis of  
502 particle trajectories in living cells”. In: *Phys. Rev. E* 97.6, pp. 1–20. DOI: 10.1103/  
503 PhysRevE.97.062121. arXiv: 1707.01838.
- 504 Briane, Vincent, Myriam Vimond, and Charles Kervrann (2019). “An overview of diffusion  
505 models for intracellular dynamics analysis”. In: *Brief. Bioinform.* 21.4, pp. 1136–1150.  
506 DOI: 10.1093/bib/bbz052.
- 507 Burk, Katja and R. Jeroen Pasterkamp (2019). “Disrupted neuronal trafficking in amy-  
508 otrophic lateral sclerosis”. In: *Acta Neuropathol.* 137, pp. 859–877. DOI: 10.1007/s00401-  
509 019-01964-7.
- 510 Christen, Verena et al. (2017). “Developmental neurotoxicity of different pesticides in PC-12  
511 cells in vitro”. In: *Toxicol. Appl. Pharmacol.* 325, pp. 25–36. DOI: 10.1016/j.taap.2017.  
512 03.027.
- 513 Dahlborg, U., W. Gudowski, and M. Davidovic (1989). “Van Hove correlation functions from  
514 coherent neutron inelastic scattering”. In: *J. Phys. Condens. Matter* 1.35, pp. 6173–6179.  
515 DOI: 10.1088/0953-8984/1/35/016.
- 516 De Bar, Roger B (1963). “Evaluation of the Van Hove Correlation Functions for Certain  
517 Physical Systems”. In: *Phys. Rev.* 130.2, pp. 827–832. DOI: 10.1103/PhysRev.130.827.
- 518 De Vos, Kurt J. and Majid Hafezparast (2017). “Neurobiology of axonal transport defects  
519 in motor neuron diseases: Opportunities for translational research?” In: *Neurobiol. Dis.*  
520 105, pp. 283–299. DOI: 10.1016/j.nbd.2017.02.004.
- 521 Dupont, A. et al. (2013). “Three-dimensional single-particle tracking in live cells: News from  
522 the third dimension”. In: *New J. Phys.* 15. DOI: 10.1088/1367-2630/15/7/075008.

- 523 Gal, Naama, Diana Lechtman-Goldstein, and Daphne Weihs (2013). “Particle tracking in  
524 living cells: A review of the mean square displacement method and beyond”. In: *Rheol.*  
525 *Acta* 52, pp. 425–443. DOI: 10.1007/s00397-013-0694-6.
- 526 Ghosh, Surya K. et al. (2016). “Anomalous, non-Gaussian tracer diffusion in crowded two-  
527 dimensional environments”. In: *New J. Phys.* 18, p. 013027. DOI: 10.1088/1367-2630/18/  
528 1/013027.
- 529 Götz, M. et al. (2015). “Probing cytoskeleton dynamics by intracellular particle transport  
530 analysis”. In: *Eur. Phys. J. Spec. Top.* 224.7, pp. 1169–1183. DOI: 10.1140/epjst/e2015-  
531 02453-4.
- 532 Grady, Martha E. et al. (2017). “Intracellular nanoparticle dynamics affected by cytoskeletal  
533 integrity”. In: *Soft Matter* 13.9, pp. 1873–1880. DOI: 10.1039/c6sm02464e.
- 534 Greene, Lloyd A (1978). “Nerve growth factor prevents the death and stimulates the neuronal  
535 differentiation of clonal PC12 pheochromocytoma cells in serum-free medium”. In: *J. Cell*  
536 *Biol.* 78.3, pp. 747–755. DOI: 10.1083/jcb.78.3.747.
- 537 Greene, Lloyd A and Arthur S Tischler (1976). “Establishment of a noradrenergic clonal line  
538 of rat adrenal pheochromocytoma cells which respond to nerve growth factor”. In: *Proc.*  
539 *Natl. Acad. Sci.* 73.7, pp. 2424–2428. DOI: 10.1073/pnas.73.7.2424.
- 540 Greene, Lloyd A. et al. (1987). “PC12 pheochromocytoma cells: culture, nerve growth factor  
541 treatment, and experimental exploitation”. In: *Methods Enzymol.* 147, pp. 207–216. DOI:  
542 10.1016/0076-6879(87)47111-5.
- 543 Grünwald, David et al. (2008). “Probing intranuclear environments at the single-molecule  
544 level”. In: *Biophys. J.* 94.7, pp. 2847–2858. DOI: 10.1529/biophysj.107.115014.
- 545 Hopkins, Paul et al. (2010). “The van Hove distribution function for Brownian hard spheres:  
546 Dynamical test particle theory and computer simulations for bulk dynamics”. In: *J. Chem.*  
547 *Phys.* 133.22, p. 224505. DOI: 10.1063/1.3511719.

- 548 Kues, Thorsten, Reiner Peters, and Ulrich Kubitscheck (2001). “Visualization and Tracking  
549 of Single Protein Molecules in the Cell Nucleus”. In: *Biophys. J.* 80.6, pp. 2954–2967.  
550 DOI: 10.1016/S0006-3495(01)76261-3.
- 551 Lawrence, Rosalie E. and Roberto Zoncu (2019). “The lysosome as a cellular centre for  
552 signalling, metabolism and quality control”. In: *Nat. Cell Biol.* 21, pp. 133–142. DOI:  
553 10.1038/s41556-018-0244-7.
- 554 Leterrier, Christophe, Pankaj Dubey, and Subhojit Roy (2017). “The nano-architecture of the  
555 axonal cytoskeleton”. In: *Nat. Rev. Neurosci.* 18, pp. 713–726. DOI: 10.1038/nrn.2017.129.
- 556 Mahowald, Jean, Delphine Arcizet, and Doris Heinrich (2009). “Impact of external stimuli  
557 and cell micro-architecture on intracellular transport states”. In: *ChemPhysChem* 10.9-10,  
558 pp. 1559–1566. DOI: 10.1002/cphc.200900226.
- 559 Menssen, Rebecca and Madhav Mani (2019). “A Jump-Distance-Based Parameter Inference  
560 Scheme for Particulate Trajectories”. In: *Biophys. J.* 117.1, pp. 143–156. DOI: 10.1016/j.  
561 bpj.2019.06.004.
- 562 Menzies, Fiona M., Angeleen Fleming, and David C. Rubinsztein (2015). “Compromised  
563 autophagy and neurodegenerative diseases”. In: *Nat. Rev. Neurosci.* 16.6, pp. 345–357.  
564 DOI: 10.1038/nrn3961.
- 565 Michalet, Xavier (2010). “Mean square displacement analysis of single-particle trajectories  
566 with localization error: Brownian motion in an isotropic medium”. In: *Phys. Rev. E* 82.4,  
567 p. 041914. DOI: 10.1103/PhysRevE.82.041914.
- 568 Moloney, Elizabeth B., Fred de Winter, and Joost Verhaagen (2014). “ALS as a distal  
569 axonopathy: Molecular mechanisms affecting neuromuscular junction stability in the  
570 presymptomatic stages of the disease”. In: *Front. Neurosci.* 8, p. 252. DOI: 10.3389/  
571 fnins.2014.00252.
- 572 Nanoscribe (n.d.). *Photonic Professional GT - Nanoscribe*. URL: [www.nanoscribe.de](http://www.nanoscribe.de).

- 573 Nixon, Ralph A (2013). “The role of autophagy in neurodegenerative disease”. In: *Nat. Med.*  
574 19.8, pp. 983–997. DOI: 10.1038/nm.3232.
- 575 Norregaard, Kamilla et al. (2017). “Manipulation and Motion of Organelles and Single  
576 Molecules in Living Cells”. In: *Chem. Rev.* 117.5, pp. 4342–4375. DOI: 10.1021/acs.  
577 chemrev.6b00638.
- 578 Otten, Marcus et al. (2012). “Local motion analysis reveals impact of the dynamic cytoskele-  
579 ton on intracellular subdiffusion”. In: *Biophys. J.* 102.4, pp. 758–767. DOI: 10.1016/j.bpj.  
580 2011.12.057.
- 581 Oyarzún, Juan Esteban et al. (2019). “Lysosome motility and distribution: Relevance in  
582 health and disease”. In: *Biochim. Biophys. Acta - Mol. Basis Dis.* 1865.6, pp. 1076–1087.  
583 DOI: 10.1016/j.bbadis.2019.03.009.
- 584 Pelzl, Carina et al. (2009). “Axonal Guidance by Surface Microstructuring for Intracellular  
585 Transport Investigations”. In: *ChemPhysChem* 10.16, pp. 2884–2890. DOI: 10.1002/cphc.  
586 200900555.
- 587 Prior, Robert et al. (2017). “Defective axonal transport: A common pathological mechanism  
588 in inherited and acquired peripheral neuropathies”. In: *Neurobiol. Dis.* 105, pp. 300–320.  
589 DOI: 10.1016/j.nbd.2017.02.009.
- 590 Ramesh, Nandini and Udai Bhan Pandey (2017). “Autophagy Dysregulation in ALS: When  
591 Protein Aggregates Get Out of Hand”. In: *Front. Mol. Neurosci.* 10, p. 263. DOI: 10.3389/  
592 fnmol.2017.00263.
- 593 S Mogre, Saurabh, Aidan I. Brown, and Elena F. Koslover (2020). “Getting around the  
594 cell: Physical transport in the intracellular world”. In: *Phys. Biol.* 17, p. 061003. DOI:  
595 10.1088/1478-3975/aba5e5.
- 596 Schindelin, Johannes et al. (2012). “Fiji: an open-source platform for biological-image anal-  
597 ysis”. In: *Nat. Methods* 9.7, pp. 676–682. DOI: 10.1038/nmeth.2019.

- 598 Schütz, G. J., H. Schindler, and Th Schmidt (1997). “Single-molecule microscopy on model  
599 membranes reveals anomalous diffusion”. In: *Biophys. J.* 73.2, pp. 1073–1080. DOI: 10.  
600 1016/S0006-3495(97)78139-6.
- 601 Sleigh, James N et al. (2019). “Axonal transport and neurological disease”. In: *Nat. Rev.*  
602 *Neurol.* 15.12, pp. 691–703. DOI: 10.1038/s41582-019-0257-2.
- 603 Srinivasan, U et al. (1998). “Alkyltrichlorosilane-based self-assembled monolayer films for  
604 stiction reduction in silicon micromachines”. In: *J. Microelectromechanical Syst.* 7.2,  
605 pp. 252–260. DOI: 10.1109/84.679393.
- 606 Tinevez, Jean Yves et al. (2017). “TrackMate: An open and extensible platform for single-  
607 particle tracking”. In: *Methods* 115, pp. 80–90. DOI: 10.1016/j.ymeth.2016.09.016.
- 608 Türkcan, Silvan and Jean Baptiste Masson (2013). “Bayesian decision tree for the classifica-  
609 tion of the mode of motion in single-molecule trajectories”. In: *PLoS One* 8.12, e82799.  
610 DOI: 10.1371/journal.pone.0082799. arXiv: 1503.03891.
- 611 Vale, Ronald D (2003). “The molecular motor toolbox for intracellular transport.” In: *Cell*  
612 112.4, pp. 467–80. DOI: 10.1016/S0092-8674(03)00111-9.
- 613 Van Hove, Léon (1954). “Correlations in space and time and Born approximation scattering  
614 in systems of interacting particles”. In: *Phys. Rev.* 95.1, pp. 249–262. DOI: 10.1103/  
615 PhysRev.95.249.
- 616 Wang, Wei-Li et al. (2015). “Current Situation of PC12 Cell Use in Neuronal Injury Study”.  
617 In: *Int. J. Biotechnol. Wellness Ind.* 4.2, pp. 61–66. DOI: 10.6000/1927-3037.2015.04.02.3.
- 618 Warburton, M J and H Wynn (1976). “The Hyperactivity of Hamster Fibroblast Lysoso-  
619 mal Enzymes After Endocytosis of Sucrose”. In: *Biochem. Biophys. Res. Commun.* 70.1,  
620 pp. 94–100. DOI: 10.1016/0006-291x(76)91113-x.
- 621 Weiss, Matthias et al. (2004). “Anomalous subdiffusion is a measure for cytoplasmic crowding  
622 in living cells”. In: *Biophys. J.* 87.5, pp. 3518–3524. DOI: 10.1529/biophysj.104.044263.

623 Witzel, Patrick et al. (2019). “Heterogeneities Shape Passive Intracellular Transport”. In:  
624 *Biophys. J.* 2, pp. 203–213. DOI: 10.1016/j.bpj.2019.06.009.
